# Supplementary material
Source: Springer Nature journal article supplement (https://www.springermedizin.de/resource/supplementary/12943_2010_823_MOESM13_ESM.pdf/9554916)

A

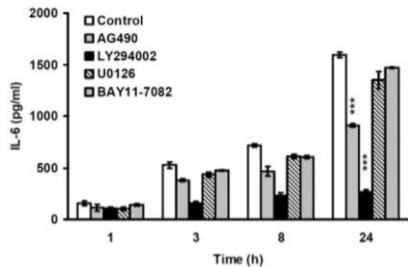

B

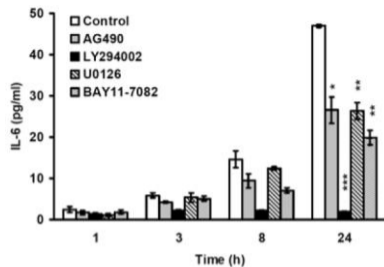

C

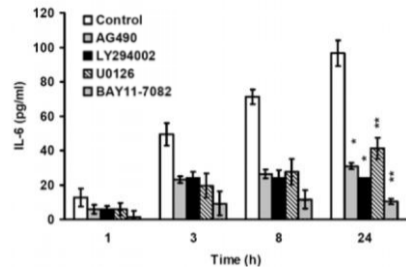

D

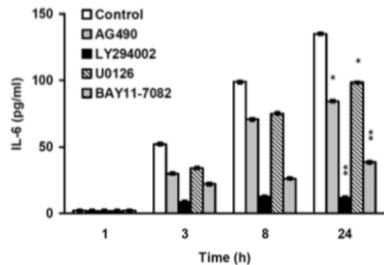

E

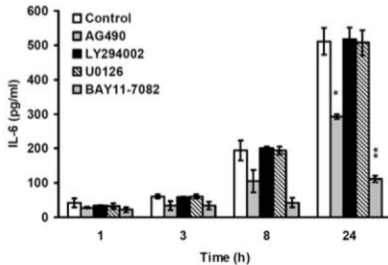

F

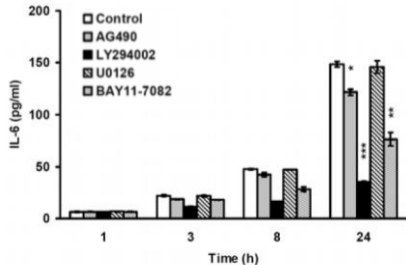

Supplement: MOESM13 [file 9554916]
